# Supplementary material for: The strong correlations between thermal conductivities and electronic spin states in the crystals of Fe(iii) spin crossover complexes
Source: Royal Society of Chemistry journal article supplement (doi:10.1039/d2dt01597h), 2022-01-01
Supplement: d2dt01597h1.pdf [file d2dt01597h1.pdf]

## Supporting Information

The strong correlations between thermal conductivities and electronic spin states in crystals of Fe(III) spin crossover complexes

Norihisa Hoshino,<sup>\*a</sup> Akari Hayashi,<sup>b</sup> and Tomoyuki Akutagawa<sup>b,c</sup>

<sup>a</sup> Department of Materials Science and Technology, Faculty of Engineering, Niigata University, 8050 Ikarashi-2, Niigata 950-2181, Japan.

<sup>b</sup> Graduate School of Engineering, Tohoku University, 6-6 Aza-aoba, Aramaki, Aoba-ku, Sendai 980-8579, Japan.

<sup>c</sup> Institute of Multidisciplinary Research for Advanced Materials (IMRAM), Tohoku University, 2-1-1 Katahira, Aoba-ku, Sendai 980-8577, Japan.

### Contents

#### Sample preparation methods for crystals 1-4.

**Table S1.** Crystallographic parameters for 1–4 at 100 K,  $T_{\text{cn}}$ ,  $T_{\text{vln}}$ , and 300 K.

**Table S2.** Coordination bond lengths for 1–4 at 100 K,  $T_{\text{cn}}$ ,  $T_{\text{vln}}$ , and 300 K.

**Figure S1.** Numbering schemes for the crystal structure analyses.

**Figure S2.** Thermal ellipsoid view of the dimerized cations in 1 at 100 K.

**Figure S3.** Thermal ellipsoid views of the cation-anion interactions in 2–4 at 100 K.

**Figure S4.** Thermal ellipsoid views of the anions in crystals 1–4 at 100 K,  $T_{\text{cn}}$ ,  $T_{\text{vln}}$ , and 300 K.

**Figure S5.** Electron-density maps for the  $\text{NO}_3^-$  and  $-\text{CF}_3$  groups in 1–4.

**Figure S6.** Temperature-dependent unit-cell constants of crystals 1–4.

**Figure S7.** Measured heat capacities and estimated specific heats of 1–4.

**Figure S8.** Crystal packing structures of 1–4.

## Sample preparation methods for crystals 1-4.

All synthetic procedures were performed in an aerobic environment. The reagents were received from commercial suppliers and used without further purification.

**[Fe(salEen)<sub>2</sub>]NO<sub>3</sub> (1).** Salicylaldehyde (105  $\mu$ l, 1.0 mmol) and *N*-ethyl-ethylenediamine (105  $\mu$ l, 1.0 mmol) were dissolved in MeOH (2.5 ml) and stirred for 30 min. The solution was put to reaction with triethylamine (139  $\mu$ l, 1.0 mmol) and MeOH solution (5 ml) of FeNO<sub>3</sub>·9H<sub>2</sub>O (139 mg, 0.5 mmol). The mixture was allowed to stand for several days to obtain black crystals of **1**. Anal: calcd. for C<sub>22</sub>H<sub>32</sub>Fe<sub>1</sub>N<sub>5</sub>O<sub>5</sub>: C 52.60, H 6.42, N 13.94. Found: C 51.95, H 6.17, N 13.89 %.

**[Fe(salEen)<sub>2</sub>]OTf (2).** Salicylaldehyde (105  $\mu$ l (1.0 mmol) and *N*-ethylethylenediamine (105  $\mu$ l, 1.0 mmol) were dissolved in MeOH (2.5 ml) and stirred for 30 min. Triethylamine (139  $\mu$ l, 1.0 mmol) was then added to the reaction solution. FeCl<sub>3</sub>·6H<sub>2</sub>O (135 mg, 0.5 mmol) and AgOTf (257 mg, 1.0 mmol) were dissolved in MeOH (5.0 ml) and the mixture was stirred for 30 min. The filtrate was then added to the reaction solution and allowed to stand for several days to obtain black crystals of **2**. Anal: calcd. for C<sub>23</sub>H<sub>32</sub>F<sub>3</sub>Fe<sub>1</sub>N<sub>4</sub>O<sub>5</sub>S<sub>1</sub>: C 46.87, H 5.47, N 9.51. Found: C 47.01, H 5.18, N 9.49 %.

**[Fe(5-Br-salEen)<sub>2</sub>]OTf (3).** 5-bromosalicylaldehyde 201 mg (1.0 mmol) and *N*-ethylethylenediamine (105  $\mu$ l, 1.0 mmol) were dissolved in MeOH (2.5 ml) and stirred for 30 min. Triethylamine (139  $\mu$ l, 1.0 mmol) was then added to the reaction solution. FeCl<sub>3</sub>·6H<sub>2</sub>O (135 mg, 0.5 mmol) and AgOTf (257 mg, 1.0 mmol) were dissolved in MeOH (5.0 ml) and the mixture was stirred for 30 min. The filtrate was then added to the reaction solution and allowed to stand for several days to obtain black crystals of **3**. Anal: calcd. for C<sub>22</sub>H<sub>32</sub>Fe<sub>1</sub>N<sub>5</sub>O<sub>5</sub>: C 36.87, H 4.30, N 7.48. Found: C 37.01, H 3.76, N 7.46 %.

**[Fe(3,5-Cl<sub>2</sub>-salEen)<sub>2</sub>]OTf (4).** 3,5-dichlorosalicylaldehyde 191 mg (1.0 mmol) and *N*-ethylethylenediamine (105  $\mu$ l, 1.0 mmol) were dissolved in MeOH (2.5 ml) and stirred for 30 min. Triethylamine (139  $\mu$ l, 1.0 mmol) was then added to the reaction solution. FeCl<sub>3</sub>·6H<sub>2</sub>O (135 mg, 0.5 mmol) and AgOTf (257 mg, 1.0 mmol) were dissolved in MeOH (5.0 ml) and the mixture was stirred for 30 min. The filtrate was then added to the reaction solution and allowed to stand for several days to obtain black crystals of **4**. Anal: calcd. for C<sub>23</sub>H<sub>30</sub>Cl<sub>4</sub>F<sub>3</sub>Fe<sub>1</sub>N<sub>4</sub>O<sub>5</sub>S<sub>1</sub>: C 37.88, H 4.15, N 7.68. Found: C 37.99, H 3.75, N 7.79 %.

**Table S1.** Crystallographic parameters for **1–4** at 100 K,  $T_{\text{Kn}}$ ,  $T_{\text{vln}}$ , and 300 K.

| [Fe(salEen) <sub>2</sub> ]NO <sub>3</sub> ( <b>1</b> ) |                                                                                   |                 |                 |                |
|--------------------------------------------------------|-----------------------------------------------------------------------------------|-----------------|-----------------|----------------|
| Formula                                                | C <sub>22</sub> H <sub>30</sub> Fe N <sub>5</sub> O <sub>5</sub>                  |                 |                 |                |
| Fw                                                     | 500.36                                                                            |                 |                 |                |
| $T / \text{K}$                                         | 100(2)                                                                            | 128(2)          | 246(2)          | 300(2)         |
| SPGR                                                   | $P2_1/c$ (#14)                                                                    | $P2_1/c$ (#14)  | $P\bar{1}$ (#2) | $P2_1/c$ (#14) |
| $a / \text{Å}$                                         | 10.3752(3)                                                                        | 10.3846(3)      | 10.4125(9)      | 10.4344(3)     |
| $b / \text{Å}$                                         | 26.2191(7)                                                                        | 26.2141(8)      | 26.399(3)       | 26.4890(7)     |
| $c / \text{Å}$                                         | 16.9929(5)                                                                        | 16.9891(5)      | 17.1521(15)     | 17.3304(4)     |
| $\beta / ^\circ$                                       | 93.921(7)                                                                         | 93.932(7)       | 93.788(7)       | 93.497(7)      |
| $V / \text{Å}^3$                                       | 4611.7(2)                                                                         | 4613.9(2)       | 4704.5(7)       | 4781.1(2)      |
| $Z$                                                    | 8                                                                                 | 8               | 8               | 8              |
| Data                                                   | 8400                                                                              | 8641            | 8490            | 8641           |
| Parameters                                             | 599                                                                               | 599             | 595             | 599            |
| $R1, wR2^{\dagger1} [I > 2\sigma(I)]$                  | 0.0699, 0.1365                                                                    | 0.0666, 0.0991  | 0.0806, 0.2003  | 0.0738, 0.1473 |
| $R1, wR2^{\dagger1}$ (all data)                        | 0.1403, 0.1772                                                                    | 0.1308, 0.1869  | 0.1762, 0.2924  | 0.1621, 0.1985 |
| GoF (all)                                              | 1.078                                                                             | 0.881           | 1.078           | 1.029          |
| [Fe(salEen) <sub>2</sub> ]OTf ( <b>2</b> )             |                                                                                   |                 |                 |                |
| Formula                                                | C <sub>23</sub> H <sub>30</sub> F <sub>3</sub> Fe N <sub>4</sub> O <sub>5</sub> S |                 |                 |                |
| Fw                                                     | 587.42                                                                            |                 |                 |                |
| $T / \text{K}$                                         | 100(2)                                                                            | 248(2)          | 300(2)          |                |
| SPGR                                                   | $P\bar{1}$ (#2)                                                                   | $P\bar{1}$ (#2) | $P\bar{1}$ (#2) |                |
| $a / \text{Å}$                                         | 9.5803(2)                                                                         | 9.6320(4)       | 9.6648(3)       |                |
| $b / \text{Å}$                                         | 17.0105(4)                                                                        | 17.2317(7)      | 17.3665(6)      |                |
| $c / \text{Å}$                                         | 17.8749(4)                                                                        | 17.9551(7)      | 18.0637(6)      |                |
| $\alpha / ^\circ$                                      | 117.516(8)                                                                        | 117.790(8)      | 117.891(8)      |                |
| $\beta / ^\circ$                                       | 92.441(7)                                                                         | 92.580(7)       | 92.564(6)       |                |
| $\gamma / ^\circ$                                      | 99.470(7)                                                                         | 98.954(7)       | 98.773(7)       |                |
| $V / \text{Å}^3$                                       | 2524.7(2)                                                                         | 2580.6(3)       | 2624.8(2)       |                |
| $Z$                                                    | 4                                                                                 | 4               | 4               |                |
| Data                                                   | 9001                                                                              | 9214            | 9349            |                |
| Parameters                                             | 671                                                                               | 667             | 671             |                |
| $R1, wR2^{\dagger1} [I > 2\sigma(I)]$                  | 0.0505, 0.0710                                                                    | 0.0532, 0.0912  | 0.0575, 0.0972  |                |
| $R1, wR2^{\dagger1}$ (all data)                        | 0.1072, 0.1161                                                                    | 0.1222, 0.1594  | 0.1233, 0.1398  |                |
| GoF (all)                                              | 1.078                                                                             | 0.823           | 1.021           |                |

| [Fe(5-Br-salEen) <sub>2</sub> ](OTf) (3)                           |                                          |                                          |                                          |                                          |
|--------------------------------------------------------------------|------------------------------------------|------------------------------------------|------------------------------------------|------------------------------------------|
| Formula                                                            | C23 H28 Br2 F3 Fe N4 O5 S                |                                          |                                          |                                          |
| Fw                                                                 | 745.22                                   |                                          |                                          |                                          |
| <i>T</i> / K                                                       | 100(2)                                   | 232(2)                                   | 254(2)                                   | 300(2)                                   |
| SPGR                                                               | <i>P</i> 2 <sub>1</sub> / <i>c</i> (#14) |
| <i>a</i> / Å                                                       | 9.4630(2)                                | 9.4977(16)                               | 9.5228(4)                                | 9.5742(3)                                |
| <i>b</i> / Å                                                       | 24.1569(4)                               | 24.352(4)                                | 24.5067(11)                              | 24.9656(8)                               |
| <i>c</i> / Å                                                       | 12.6631(2)                               | 12.701(2)                                | 12.6996(6)                               | 12.6100(4)                               |
| $\beta$ / °                                                        | 107.221(8)                               | 107.220(8)                               | 106.982(8)                               | 106.182(8)                               |
| <i>V</i> / Å <sup>3</sup>                                          | 2764.98(14)                              | 2805.8(8)                                | 2834.5(2)                                | 2894.70(19)                              |
| <i>Z</i>                                                           | 4                                        | 4                                        | 4                                        | 4                                        |
| Data                                                               | 5061                                     | 5086                                     | 5121                                     | 5283                                     |
| Parameters                                                         | 354                                      | 352                                      | 352                                      | 354                                      |
| <i>R</i> 1, <i>wR</i> 2 <sup>†1</sup> [ <i>I</i> > 2σ( <i>I</i> )] | 0.0295, 0.0724                           | 0.0838, 0.2144                           | 0.0616, 0.1242                           | 0.0590, 0.0981                           |
| <i>R</i> 1, <i>wR</i> 2 <sup>†1</sup> (all data)                   | 0.0317, 0.0735                           | 0.1407, 0.3006                           | 0.1232, 0.1498                           | 0.1254, 0.1429                           |
| GoF (all)                                                          | 1.036                                    | 1.031                                    | 0.982                                    | 1.031                                    |

| [Fe(3,5-Cl <sub>2</sub> -salEen) <sub>2</sub> ](OTf) (4)           |                                          |                                          |                                          |                                          |
|--------------------------------------------------------------------|------------------------------------------|------------------------------------------|------------------------------------------|------------------------------------------|
| Formula                                                            | C23 H26 Cl4 F3 Fe N4 O5 S                |                                          |                                          |                                          |
| Fw                                                                 | 725.19                                   |                                          |                                          |                                          |
| <i>T</i> / K                                                       | 100(2)                                   | 166(2)                                   | 206(2)                                   | 300(2)                                   |
| SPGR                                                               | <i>P</i> 2 <sub>1</sub> / <i>n</i> (#14) |
| <i>a</i> / Å                                                       | 12.9046(2)                               | 12.9434(4)                               | 12.9687(6)                               | 13.1344(7)                               |
| <i>b</i> / Å                                                       | 16.5620(3)                               | 16.5560(5)                               | 16.5697(8)                               | 16.6871(9)                               |
| <i>c</i> / Å                                                       | 14.1674(3)                               | 14.1963(4)                               | 14.2061(7)                               | 14.2579(7)                               |
| $\beta$ / °                                                        | 91.087(6)                                | 91.038(6)                                | 90.864(6)                                | 90.518(6)                                |
| <i>V</i> / Å <sup>3</sup>                                          | 3027.40(10)                              | 3041.64(16)                              | 3052.4(3)                                | 3124.8(3)                                |
| <i>Z</i>                                                           | 4                                        | 4                                        | 4                                        | 4                                        |
| Data                                                               | 5536                                     | 5513                                     | 5509                                     | 5647                                     |
| Parameters                                                         | 370                                      | 370                                      | 370                                      | 372                                      |
| <i>R</i> 1, <i>wR</i> 2 <sup>†1</sup> [ <i>I</i> > 2σ( <i>I</i> )] | 0.0680, 0.1309                           | 0.0625, 0.1253                           | 0.0630, 0.1517                           | 0.0791, 0.1846                           |
| <i>R</i> 1, <i>wR</i> 2 <sup>†1</sup> (all data)                   | 0.1212, 0.1527                           | 0.1283, 0.1506                           | 0.1024, 0.1730                           | 0.1841, 0.2361                           |
| GoF (all)                                                          | 1.031                                    | 0.936                                    | 0.976                                    | 0.993                                    |

<sup>†1</sup>  $R1 = \Sigma (|F_o| - |F_c|) / \Sigma |F_o|$ ,  $wR2 = \{\Sigma [w(F_o^2 - F_c^2)^2] / \Sigma [w(F_o^2)^2]\}^{1/2}$ .

**Table S2.** Coordination bond lengths for **1–4** at 100 K,  $T_{kn}$ ,  $T_{vln}$ , and 300 K.

| [Fe(salEen) <sub>2</sub> ]NO <sub>3</sub> ( <b>1</b> ) |          |          |          |          | [Fe(salEen) <sub>2</sub> ]OTf ( <b>2</b> ) |          |          |
|--------------------------------------------------------|----------|----------|----------|----------|--------------------------------------------|----------|----------|
| <i>T</i> / K                                           | 100      | 128      | 246      | 300      | 100                                        | 248      | 300      |
| Fe1-O1                                                 | 1.904(3) | 1.911(3) | 1.920(4) | 1.931(3) | 1.880(2)                                   | 1.874(3) | 1.883(3) |
| Fe1-O2                                                 | 1.906(3) | 1.899(3) | 1.921(5) | 1.923(3) | 1.878(2)                                   | 1.871(3) | 1.882(3) |
| Fe1-N1                                                 | 2.025(4) | 2.028(4) | 2.088(6) | 2.092(4) | 1.925(3)                                   | 1.929(4) | 1.949(3) |
| Fe1-N3                                                 | 2.040(4) | 2.051(4) | 2.113(6) | 2.116(4) | 1.931(3)                                   | 1.926(4) | 1.957(3) |
| Fe1-N2                                                 | 2.146(4) | 2.156(4) | 2.213(6) | 2.220(4) | 2.042(3)                                   | 2.049(3) | 2.072(3) |
| Fe1-N4                                                 | 2.112(4) | 2.134(4) | 2.174(5) | 2.175(4) | 2.030(3)                                   | 2.036(3) | 2.064(3) |
| Fe2-O3                                                 | 1.881(3) | 1.880(3) | 1.882(5) | 1.903(3) | 1.878(2)                                   | 1.881(3) | 1.881(3) |
| Fe2-O4                                                 | 1.869(3) | 1.867(3) | 1.880(4) | 1.895(3) | 1.858(2)                                   | 1.856(3) | 1.861(3) |
| Fe2-N5                                                 | 1.925(4) | 1.922(4) | 1.967(6) | 2.018(4) | 1.928(3)                                   | 1.920(4) | 1.947(3) |
| Fe2-N7                                                 | 1.935(4) | 1.916(4) | 1.964(6) | 2.031(4) | 1.930(3)                                   | 1.923(4) | 1.948(3) |
| Fe2-N6                                                 | 2.057(4) | 2.044(4) | 2.091(6) | 2.154(4) | 2.050(3)                                   | 2.050(3) | 2.062(3) |
| Fe2-N8                                                 | 2.044(4) | 2.055(4) | 2.066(5) | 2.136(4) | 2.036(3)                                   | 2.046(4) | 2.060(3) |

  

| [Fe(5-Br-salEen) <sub>2</sub> ]OTf ( <b>3</b> ) |            |          |          | [Fe(3,5-Cl <sub>2</sub> -salEen) <sub>2</sub> ]OTf ( <b>4</b> ) |          |          |          |          |
|-------------------------------------------------|------------|----------|----------|-----------------------------------------------------------------|----------|----------|----------|----------|
| <i>T</i> / K                                    | 100        | 232      | 254      | 300                                                             | 100      | 166      | 206      | 300      |
| Fe1-O1                                          | 1.8698(6)  | 1.872(7) | 1.865(4) | 1.890(4)                                                        | 1.864(3) | 1.857(3) | 1.858(3) | 1.867(5) |
| Fe1-O2                                          | 1.8820(16) | 1.875(7) | 1.889(4) | 1.920(4)                                                        | 1.873(3) | 1.872(3) | 1.872(3) | 1.870(5) |
| Fe1-N1                                          | 1.9211(19) | 1.923(7) | 1.957(4) | 2.052(4)                                                        | 1.917(4) | 1.912(4) | 1.915(4) | 1.939(6) |
| Fe1-N3                                          | 1.9216(19) | 1.927(7) | 1.942(4) | 2.037(4)                                                        | 1.928(4) | 1.909(4) | 1.919(4) | 1.931(6) |
| Fe1-N2                                          | 2.061(2)   | 2.076(8) | 2.080(5) | 2.188(4)                                                        | 2.039(4) | 2.031(4) | 2.029(4) | 2.038(6) |
| Fe1-N4                                          | 2.053(2)   | 2.060(9) | 2.079(5) | 2.185(4)                                                        | 2.030(4) | 2.032(4) | 2.033(4) | 2.053(6) |

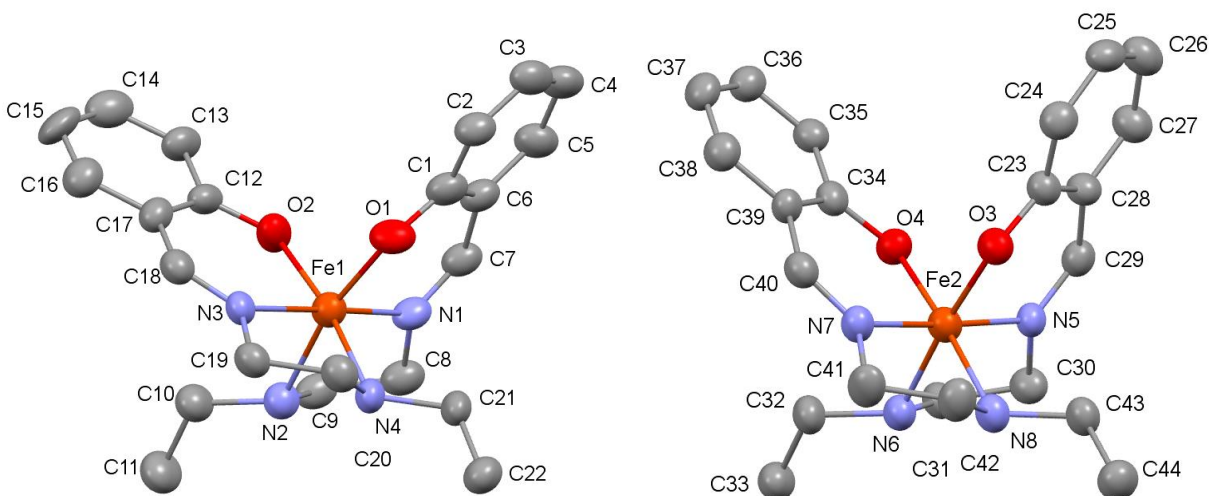

**Fig. S1** Numbering schemes for the crystal structure analyses. Note that numbers for Fe, C, N, and O atoms are unified in the CIF.

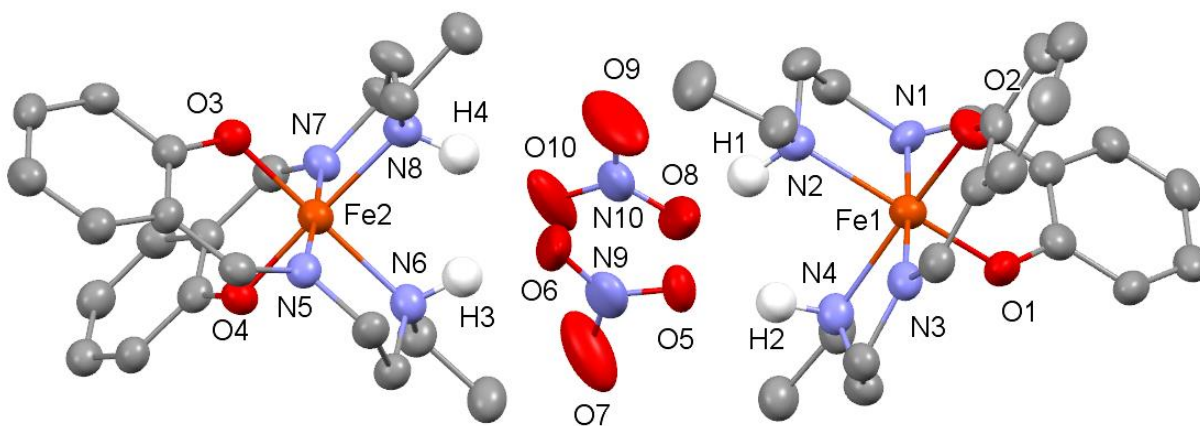

**Fig. S2** A view of the cations dimerized with two  $\text{NO}_3^-$  anions via hydrogen bonding in crystal **1** at 100 K. The close N(amino)-O(nitric) contacts are at distances of;  $\text{N2-O8} = 3.388(7) \text{ \AA}$ ,  $\text{N2-O9} = 3.441(7) \text{ \AA}$ ,  $\text{N4-O5} = 2.990(5) \text{ \AA}$ ,  $\text{N4-O8} = 3.346(7) \text{ \AA}$ ,  $\text{N6-O6}^* = 3.559(7) \text{ \AA}$ ,  $\text{N6-O7}^* = 3.300(7) \text{ \AA}$ ,  $\text{N8-O10}^* = 3.195(6) \text{ \AA}$ . A symmetry for the key \*;  $2 - x, 1 - y, 1 - z$ .

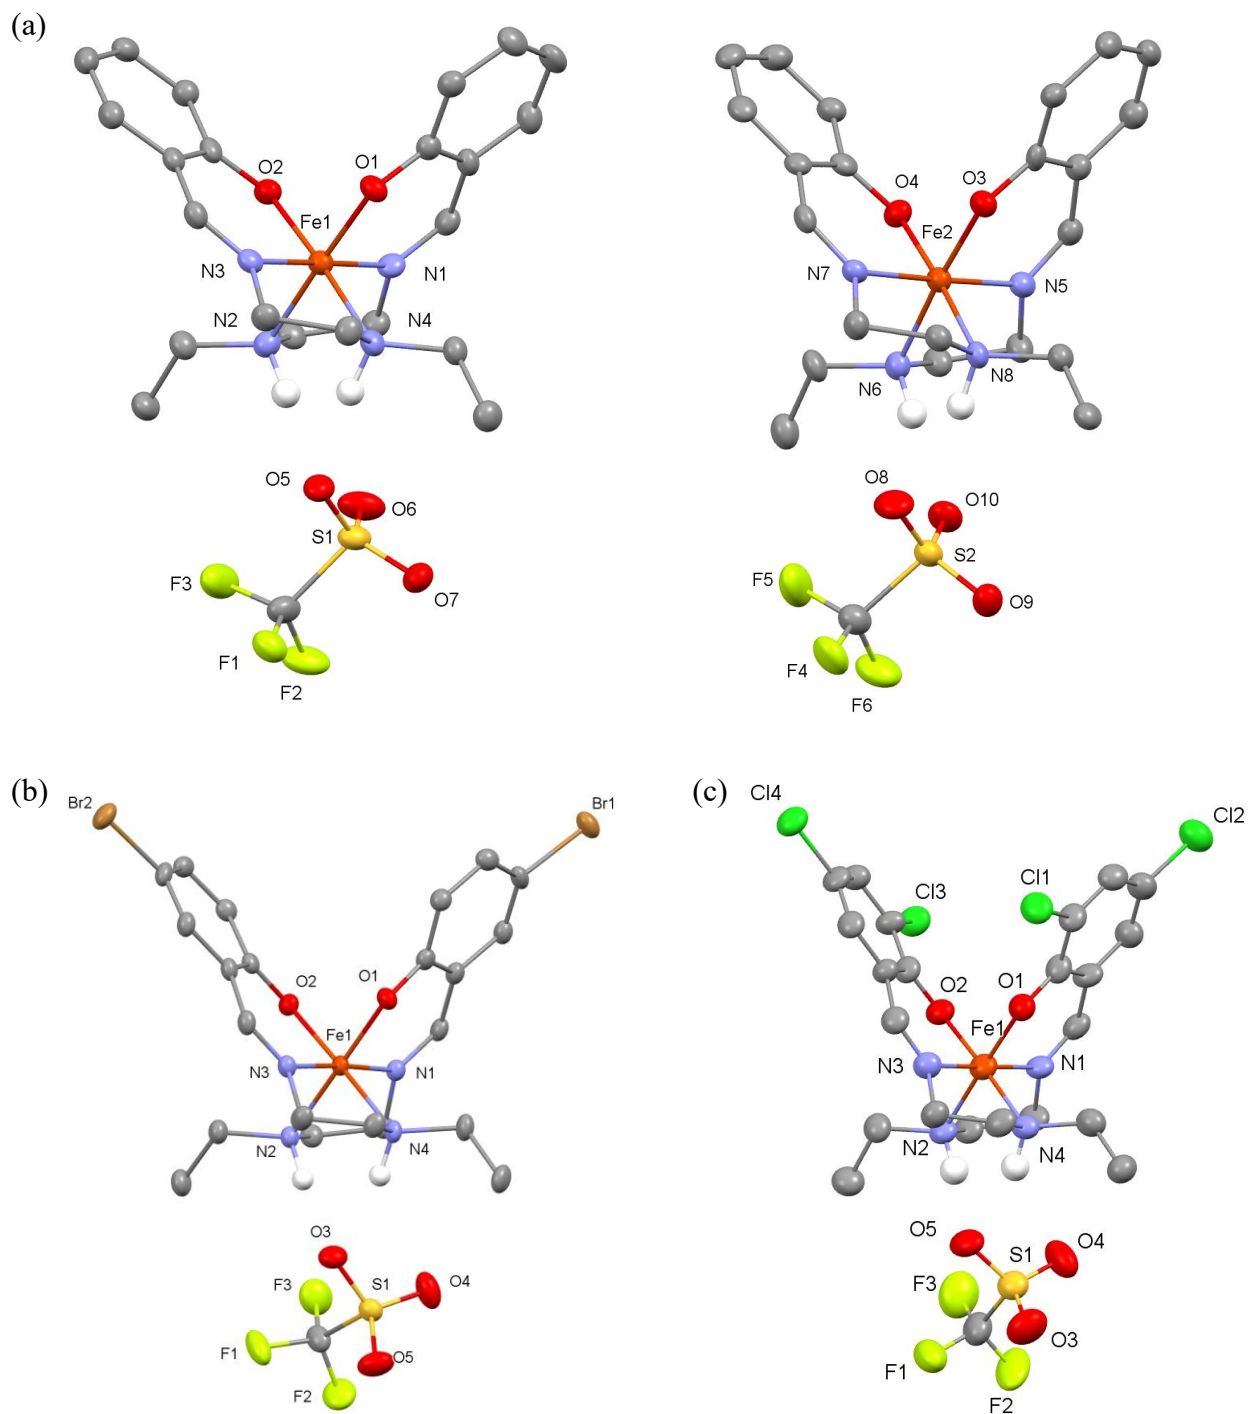

**Fig. S3** Thermal ellipsoid views of the cation-anion interactions at 100 K (a) in crystal **2**, (b) **3** and (d) **4**. The close N(amino)-O(sulfoxy) contacts are at the distances of; (a) N2-O5 = 2.974(4) Å, N4-O5 = 2.945(4) Å, N6-O10 = 3.035(4) Å, N8-O8 = 3.165(4) Å, N8-O10 = 3.260(4) Å, (b) N2-O3 = 3.004(3) Å, N4-O3 = 2.995(3) Å, (c) N2-O5 = 3.085(5) Å, N4-O5 = 3.003(5) Å.

(a)

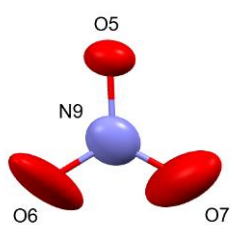

100 K

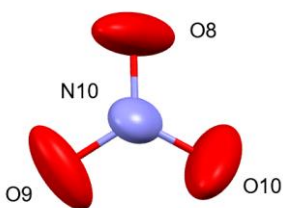

128 K ( $T_{k1}$ )

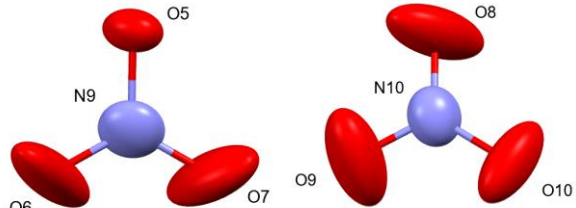

246 K ( $T_{v1}$ )

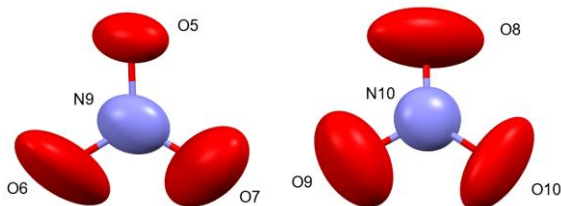

300 K

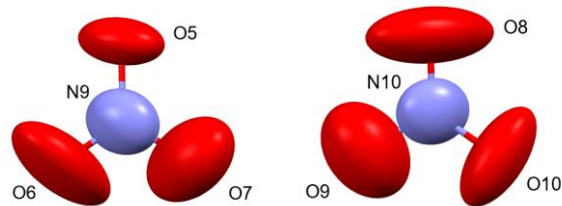

(b)

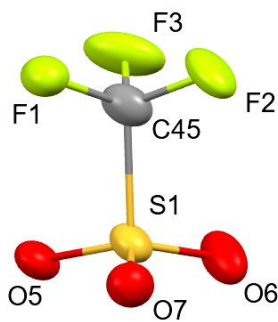

100 K

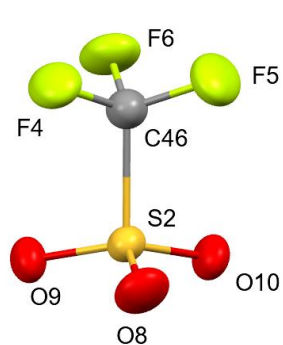

248 K ( $T_{k2}$ )

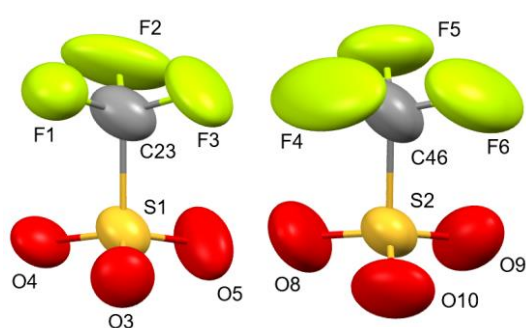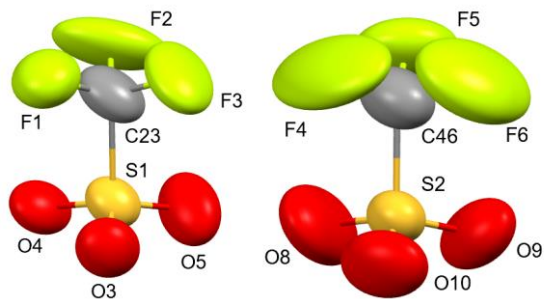

300 K



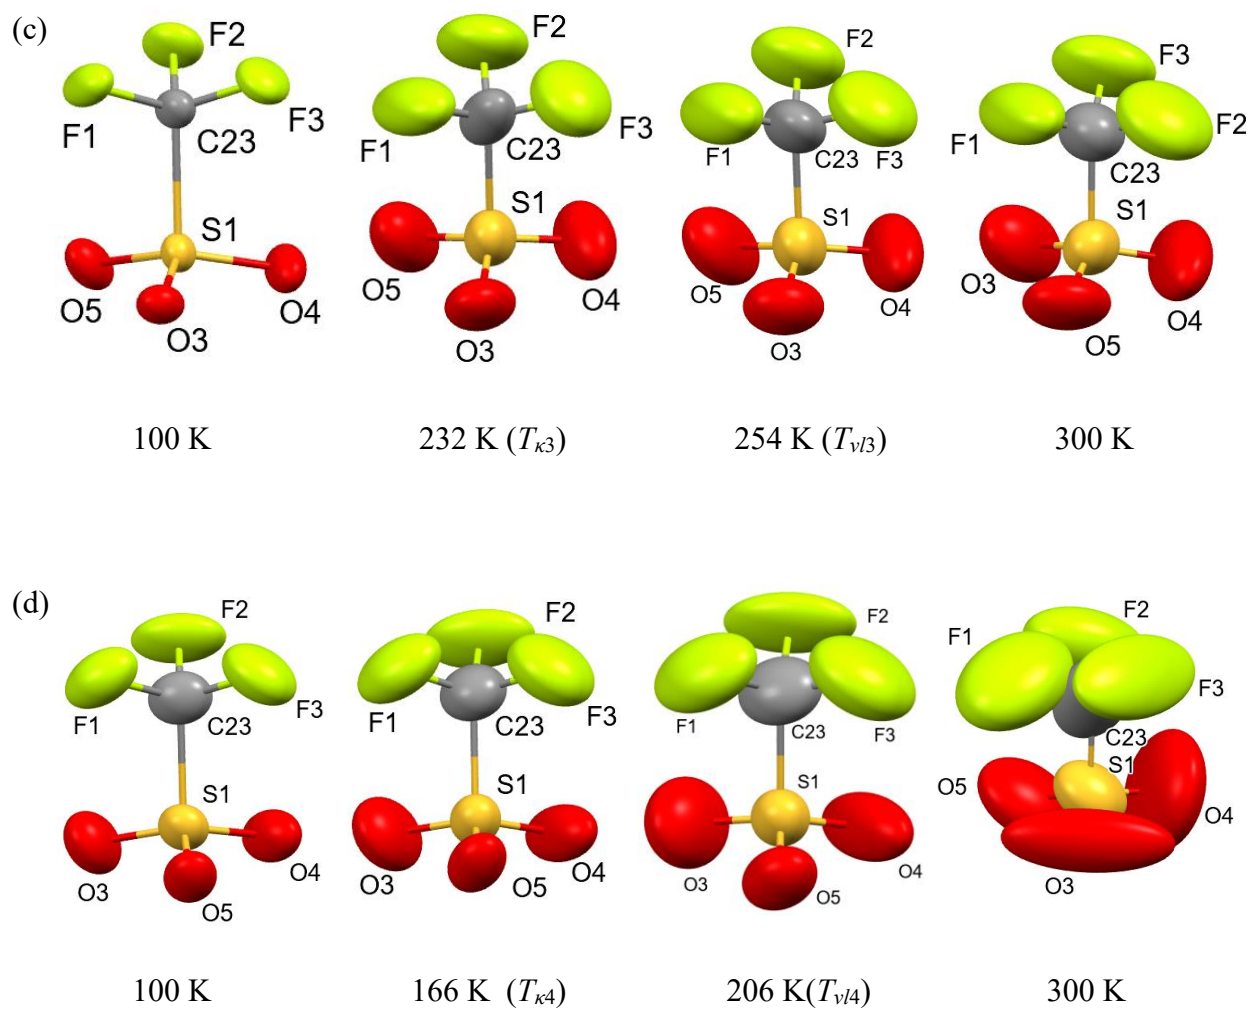

**Fig. S4** Thermal ellipsoid views of the anions in crystals **1–4** at 100 K,  $T_{\kappa n}$ ,  $T_{\nu n}$ , and 300 K at a probability level of 50 %.

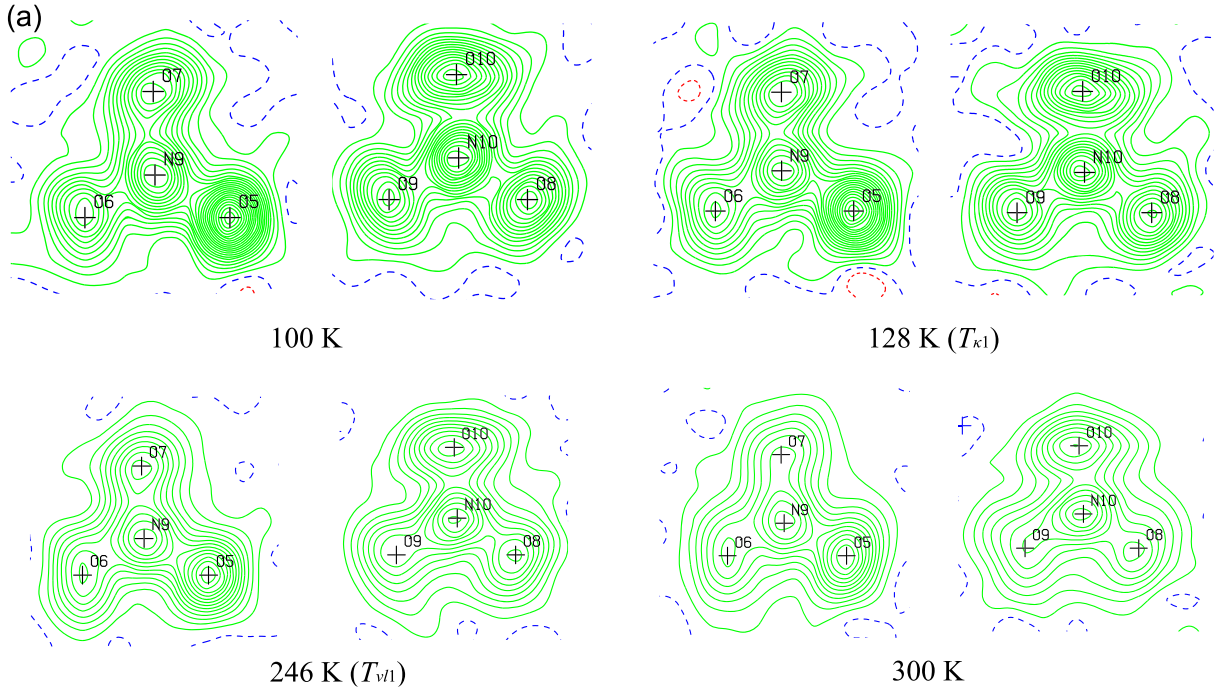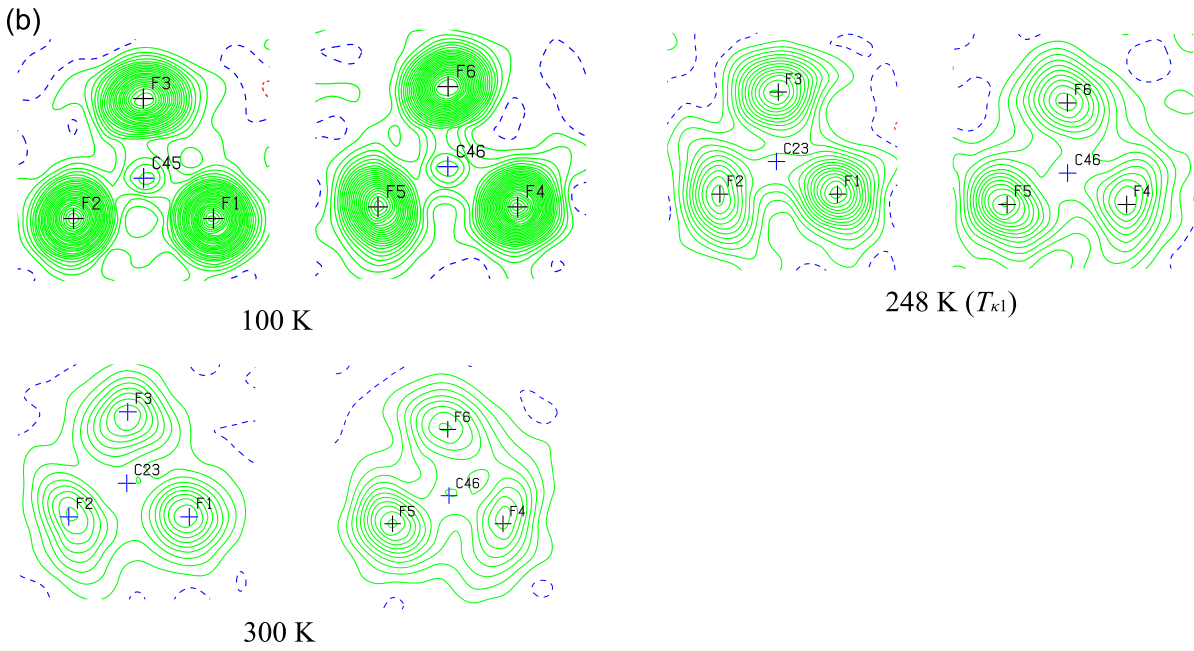

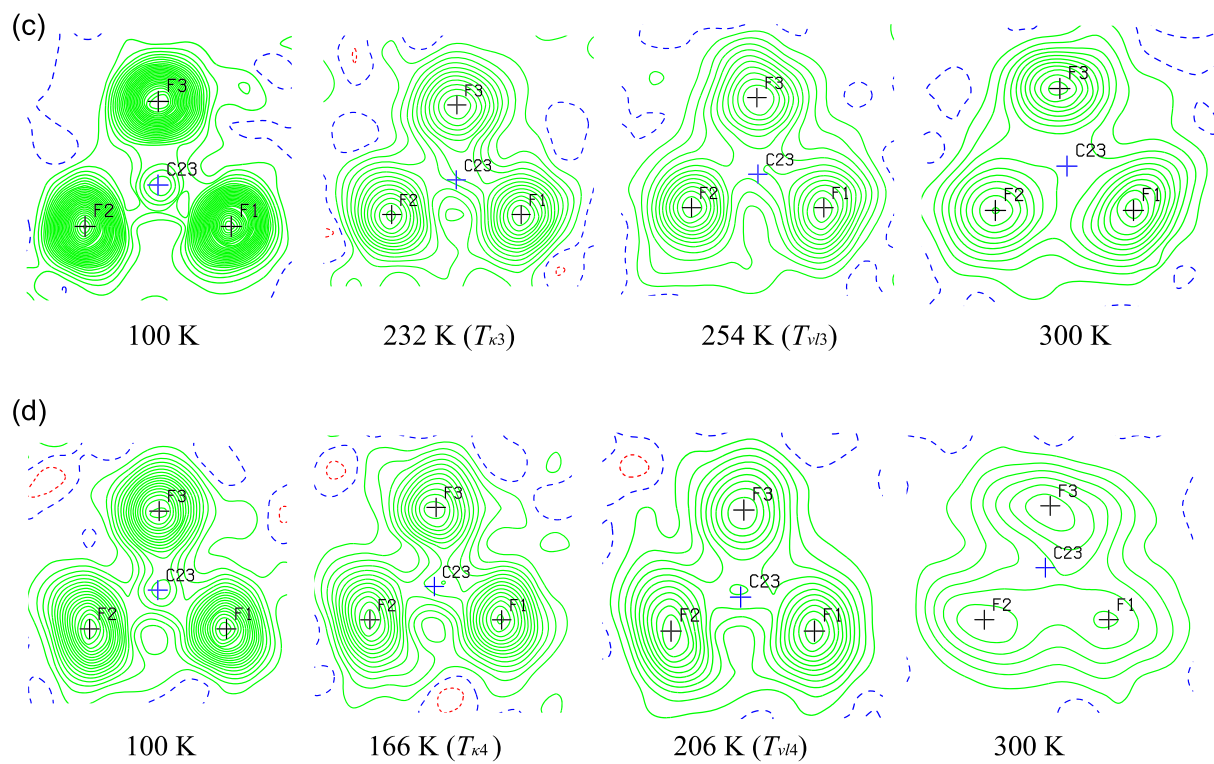

**Fig. S5** Electron-density maps around (a) the  $\text{NO}_3^-$  anions in **1** and (b–d)  $-\text{CF}_3$  groups in **2**, **3**, and **4** at 100 K,  $T_{\kappa}$ ,  $T_{v}$ , and 300 K, respectively. The contour interval is  $0.5 \text{ \AA}^3$ .

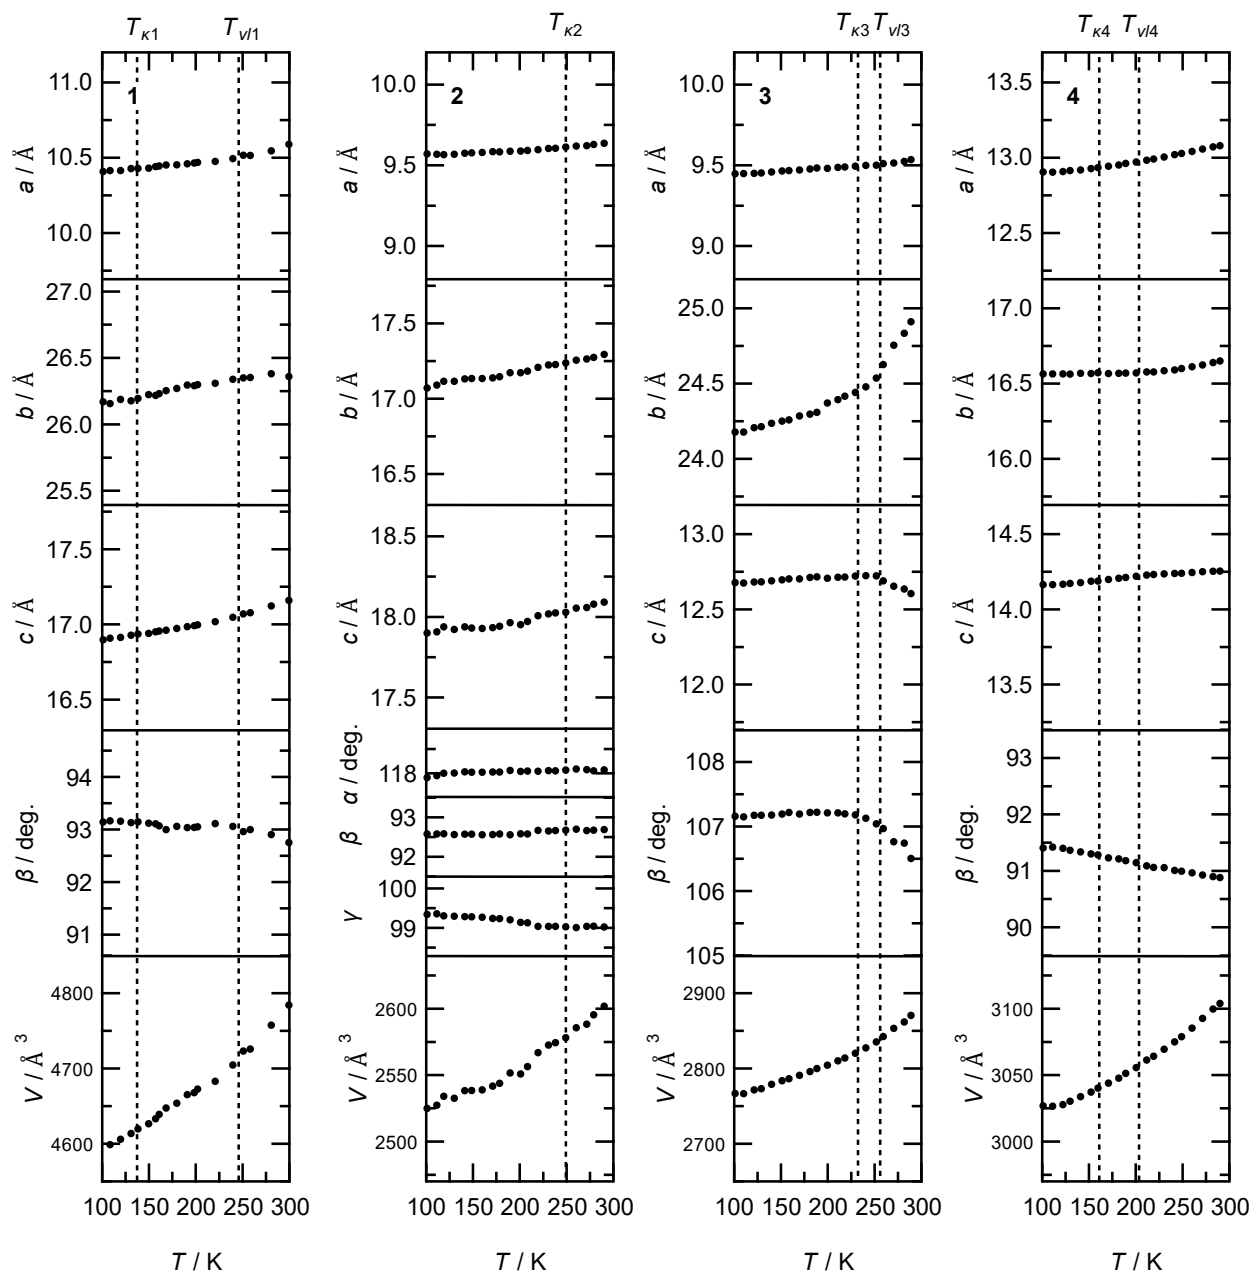

**Fig. S6** Temperature-dependent unit-cell constants of crystals 1–4 calculated using powder X-ray diffraction data using the LeBail method in the temperature range of 100–300 K.  $T_{\kappa}$  and  $T_{\nu}$  are indicated by broken lines.

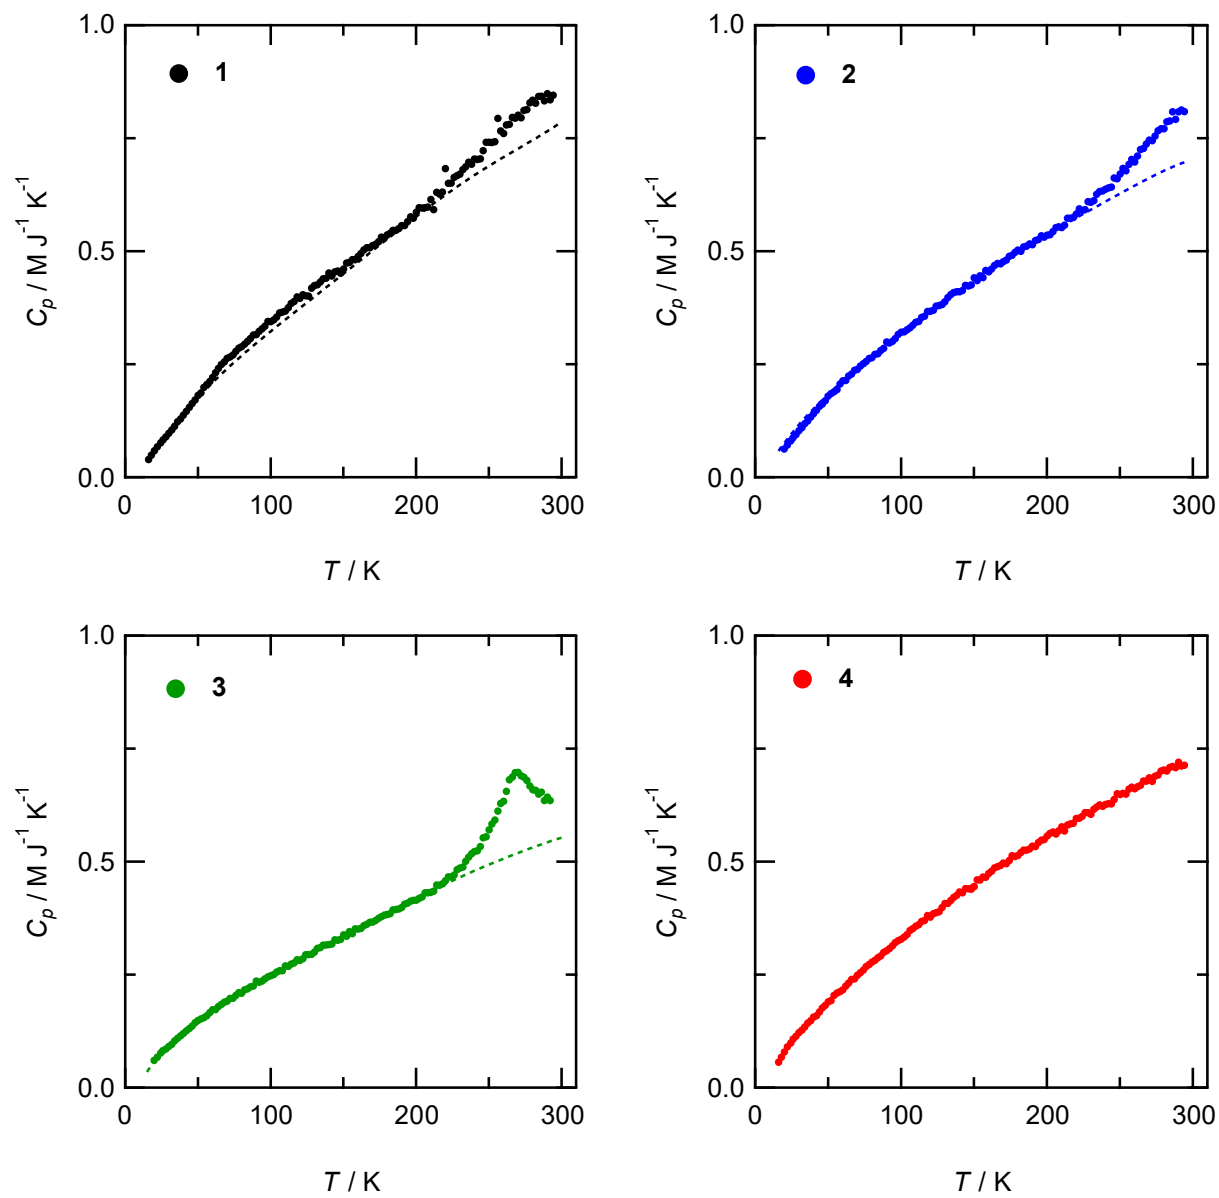

**Fig. S7** Measured heat capacities (markers) and estimated specific heats (broken lines) for 1–4.

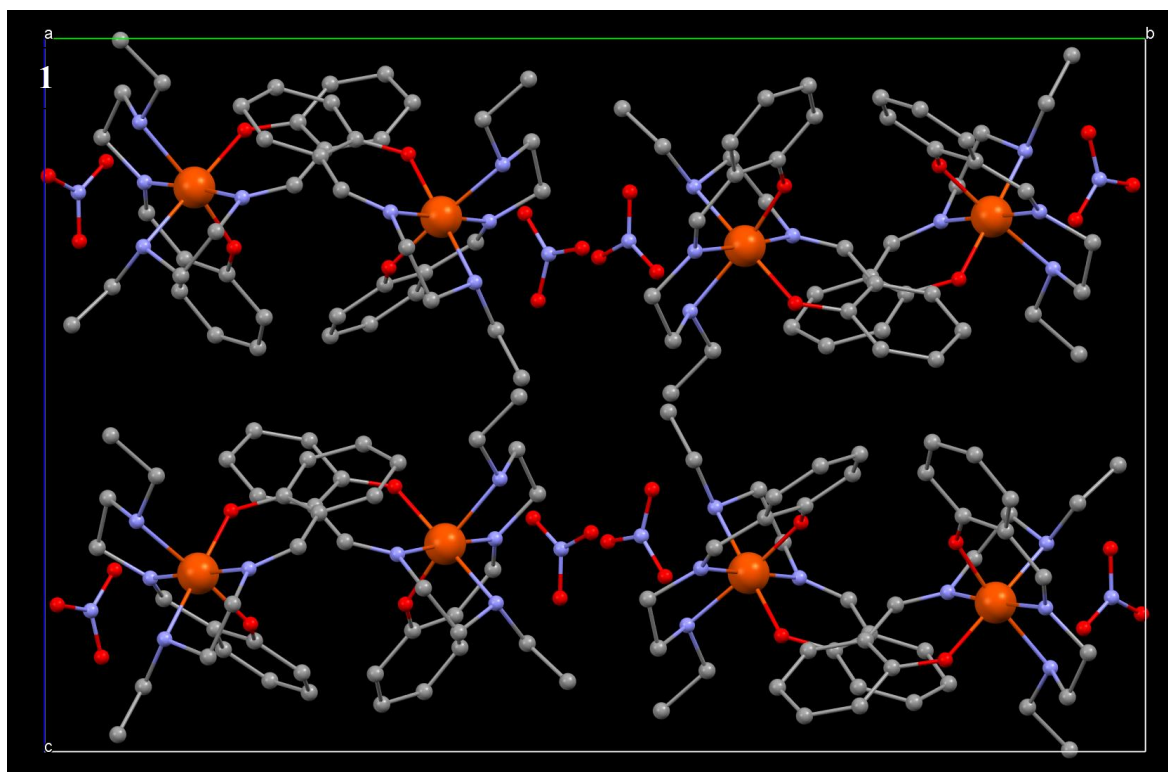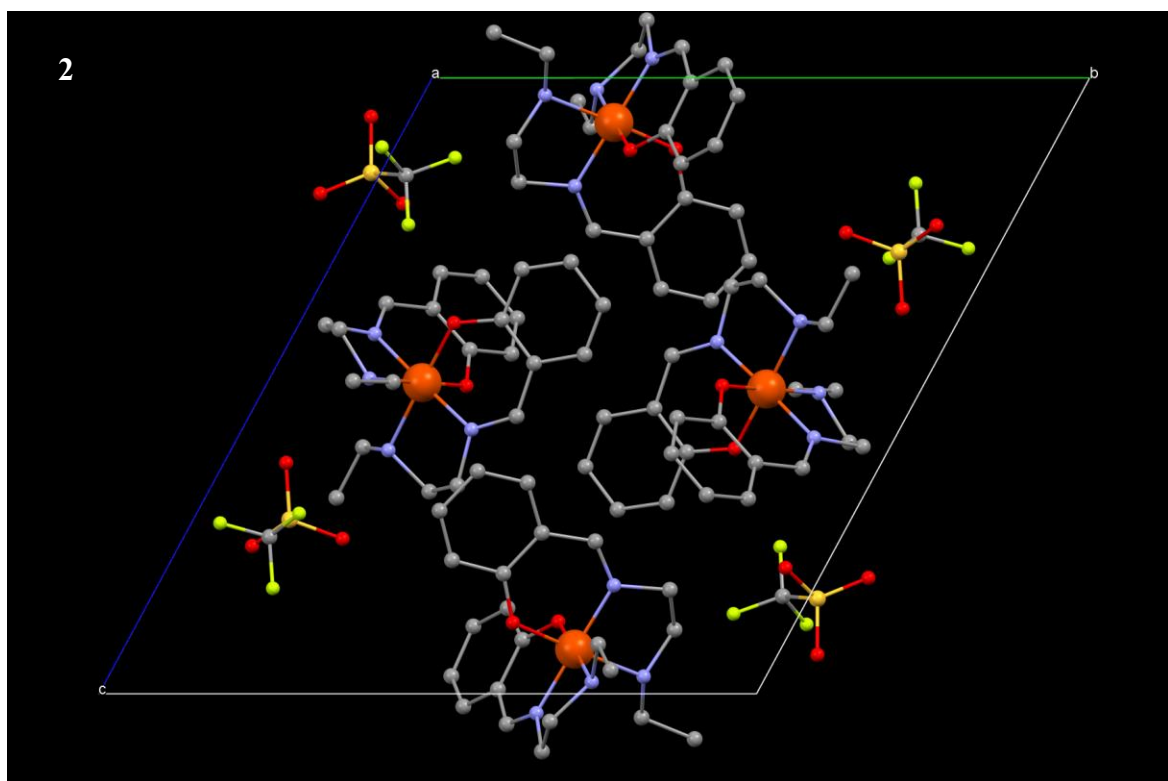

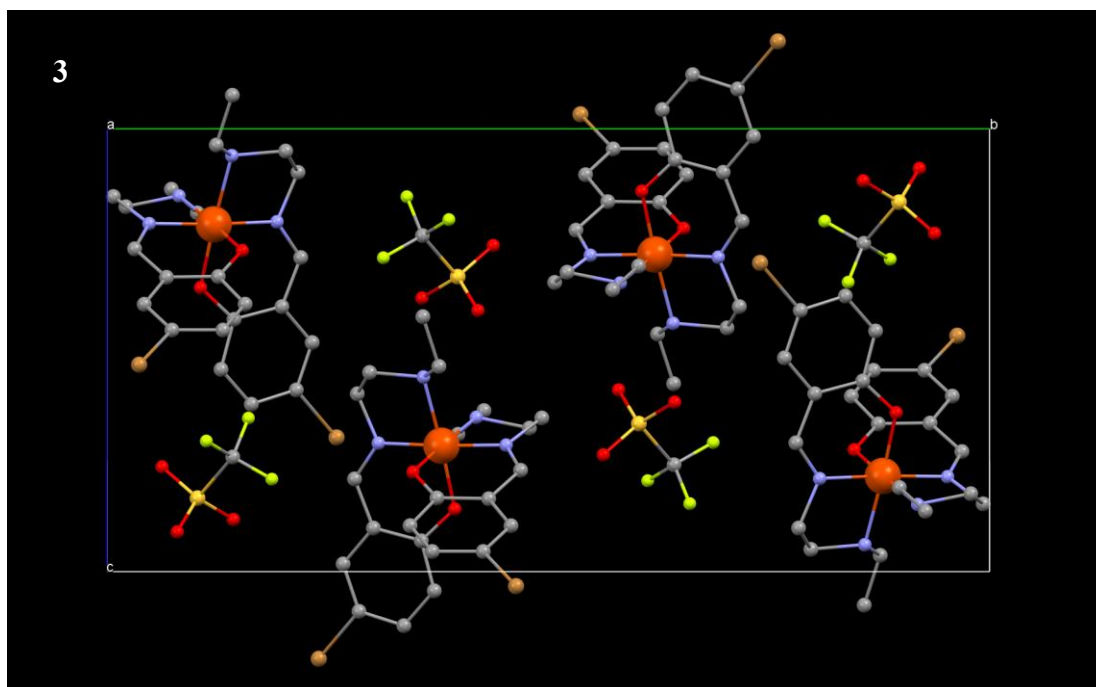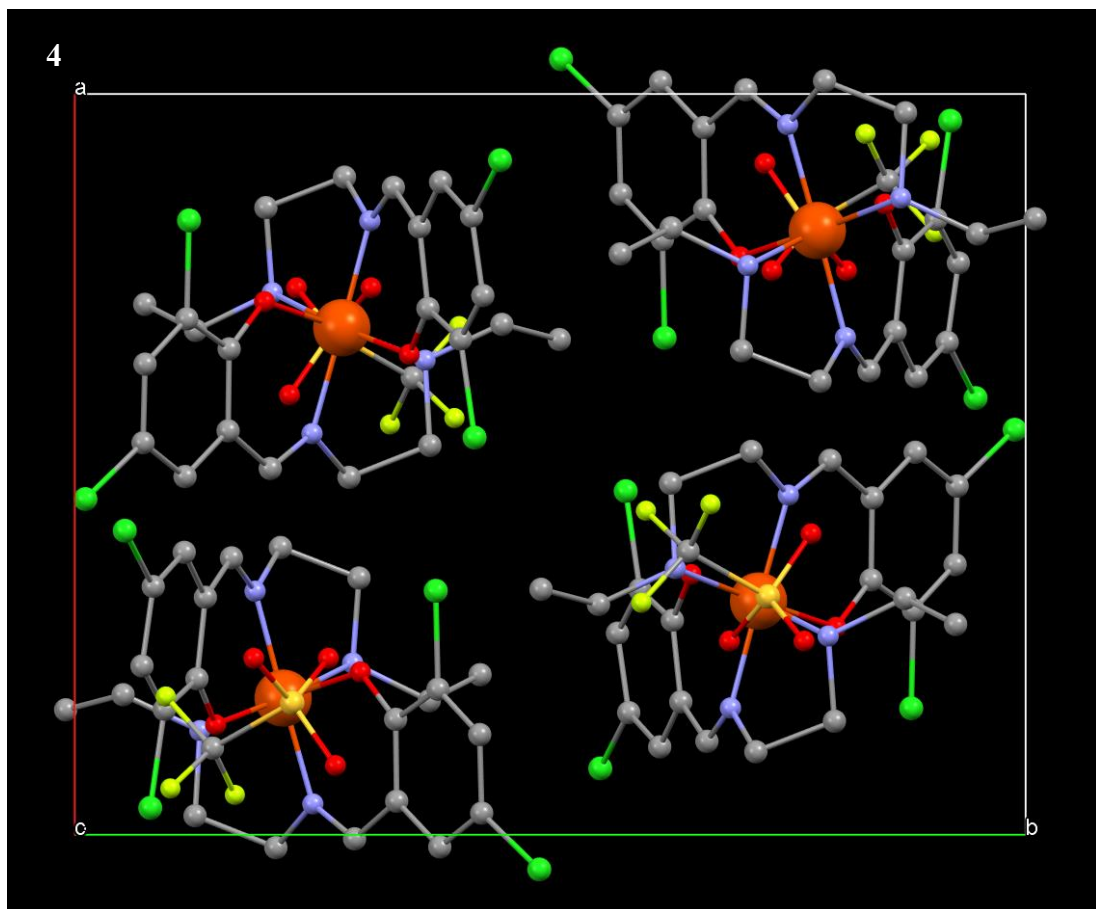

**Fig. S8** Crystal packing structures of 1–4.
